# Supplementary material for: Genetic prediction of male pattern baldness
Source: PubMed Central journal article supplement (PMC5308812; doi:10.1371/journal.pgen.1006594), 2017-02-14

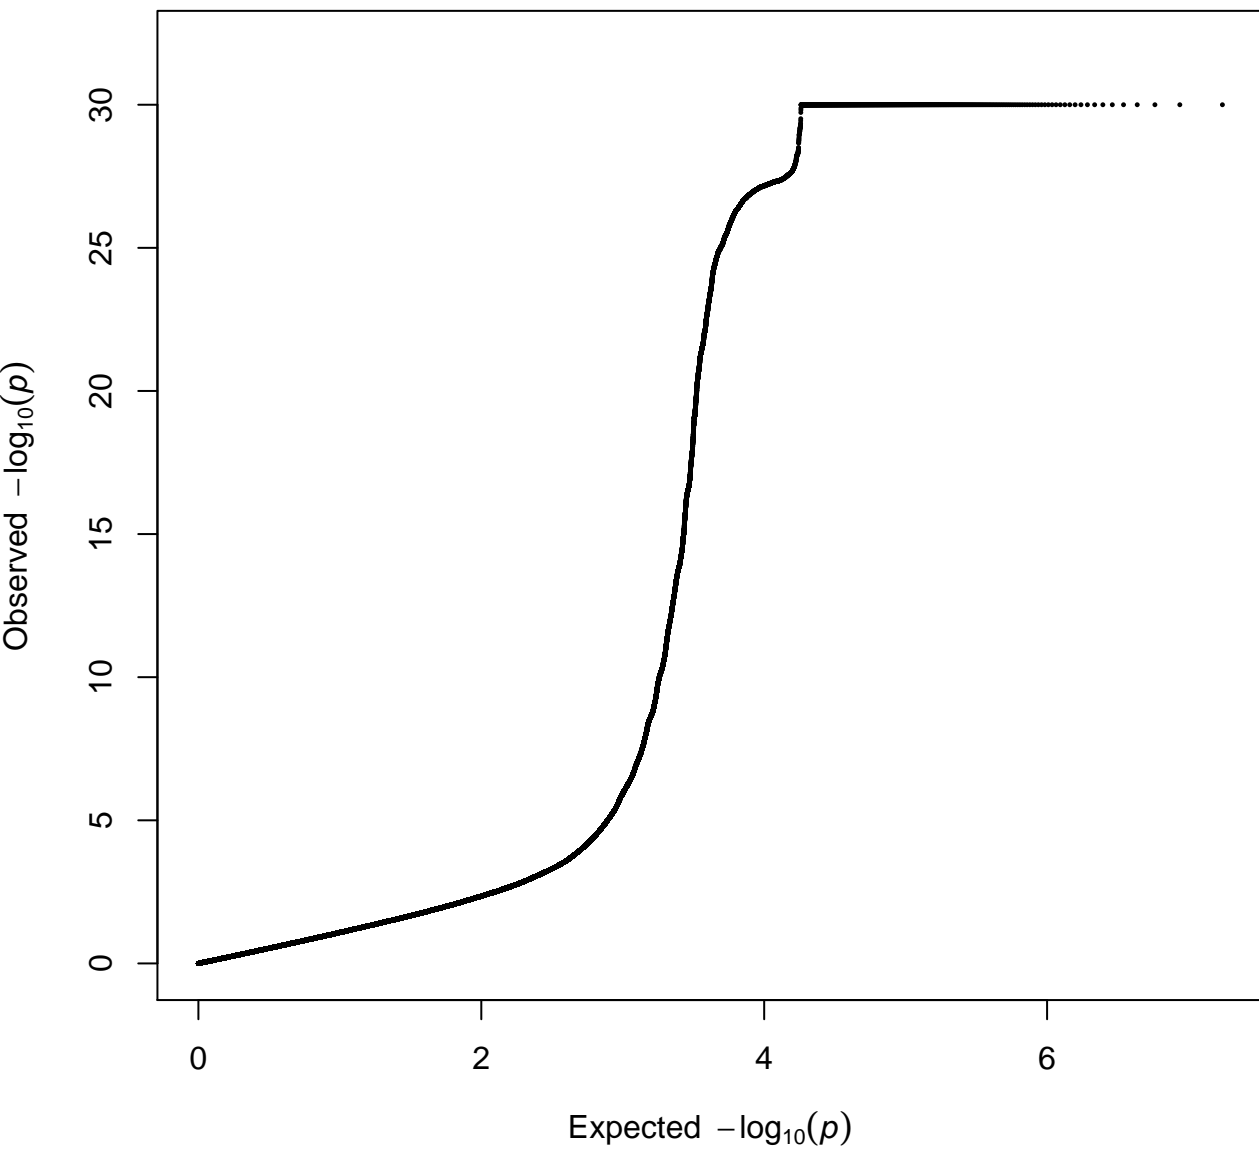

Supplement: pgen.1006594.s010.pdf [file pgen.1006594.s010.pdf]
