# Supplementary material for: Genetic prediction of male pattern baldness
Source: PLoS Genet. 2017 Feb 14;13(2):e1006594. doi: 10.1371/journal.pgen.1006594 (PMC5308812; doi:10.1371/journal.pgen.1006594)
Supplement: S2 Table — (XLSX) [file pgen.1006594.s002.xlsx]

## Sheet: S2 Table
S2 Table. Summary information for the 287 independent loci associated with male pattern baldness.
CHR	SNP	Position	Effect allele	Other allele	Beta	SE	P	MAF	N_SNPs_in_cluster	Range	KB_range	Genes_within_range
1	rs7542354	11040385	A	G	-0.116451	0.00744893	5.736e-55	0.22052	81	chr1:11028148..11081210	53.063	[C1orf127,TARDBP]
1	rs12745121	25467880	A	G	-0.0704344	0.00667751	5.507e-26	0.306143	53	chr1:25425300..25505072	79.773	[]
1	rs10919382	170361164	G	A	0.0655539	0.00633531	4.544e-25	0.382407	450	chr1:170195301..170554924	359.624	[GORAB]
1	rs188468174	25291697	T	C	-0.238642	0.0253417	4.822e-21	0.0154185	13	chr1:25016660..25349110	332.451	[CLIC4,RUNX3]
1	rs111668293	119438822	T	TG	-0.0766429	0.00877483	2.52e-18	0.1448	91	chr1:119203617..119746496	542.88	[TBX15,WARS2]
1	rs61776403	25361242	A	G	-0.0576954	0.00668303	6.133e-18	0.313765	55	chr1:25321218..25415523	94.306	[]
1	rs17186024	119672649	A	G	-0.0768261	0.0091851	6.197e-17	0.128052	97	chr1:119504361..119789289	284.929	[TBX15,WARS2]
1	rs78448052	203965400	T	C	-0.143018	0.0178353	1.09e-15	0.0336955	3	chr1:203716595..203965400	248.806	[LAX1,SNRPE,ZBED6,ZC3H11A]
1	rs6600257	25472465	A	G	0.0585318	0.00749964	6.077e-15	0.213933	7	chr1:25435663..25508191	72.529	[]
1	rs12123537	203791174	T	C	-0.12566	0.0168057	7.708e-14	0.0347933	3	chr1:203714162..203791174	77.013	[LAX1,ZBED6,ZC3H11A]
1	rs116315504	203790079	T	C	-0.119572	0.0162822	2.107e-13	0.0370125	1	chr1:203790079..203790079	0.001	[ZC3H11A]
1	rs6683032	47947741	C	T	0.0459929	0.00626372	2.123e-13	0.423338	32	chr1:47943032..48002096	59.065	[]
1	rs12083887	118881689	G	A	-0.0451607	0.0062907	7.116e-13	0.400004	50	chr1:118849762..118970053	120.292	[]
1	rs2143109	170773031	G	A	0.0450702	0.00634295	1.213e-12	0.382274	171	chr1:170668367..170901445	233.079	[PRRX1]
1	rs67803788	118554275	A	G	0.0432917	0.00622619	3.613e-12	0.444716	128	chr1:118536585..118837474	300.89	[SPAG17]
1	rs10888690	50960521	C	T	-0.042772	0.00627161	9.205e-12	0.406595	356	chr1:50649699..51458009	808.311	[CDKN2C,DMRTA2,ELAVL4,FAF1]
1	rs4649041	25321754	G	C	-0.0559079	0.00819801	9.221e-12	0.172197	26	chr1:25318121..25345010	26.89	[]
1	rs186127900	25318225	T	G	-0.180334	0.0267803	1.669e-11	0.0139605	1	chr1:25318225..25318225	0.001	[]
1	rs1005734	25262022	A	C	-0.0421434	0.00626986	1.816e-11	0.424633	30	chr1:25184269..25262022	77.754	[RUNX3]
1	rs115282290	203979114	T	C	-0.112802	0.0168048	1.933e-11	0.0434424	1	chr1:203979114..203979114	0.001	[]
1	rs200541723	119692155	A	AAAG	0.0445961	0.0066756	2.406e-11	0.308529	85	chr1:119467922..119795133	327.212	[TBX15,WARS2]
1	rs71635652	170224362	G	T	0.0457529	0.00689978	3.365e-11	0.286247	7	chr1:170209790..170224362	14.573	[]
1	rs115176171	25333134	G	A	0.073956	0.0111757	3.686e-11	0.0942303	2	chr1:25333134..25362858	29.725	[]
1	rs79598985	25273023	A	G	0.0794293	0.012298	1.065e-10	0.0674671	44	chr1:24816853..25305261	488.409	[CLIC4,NCMAP,RCAN3,RUNX3,SRRM1]
1	rs12144907	152118217	C	G	0.0518646	0.00808804	1.444e-10	0.182979	18	chr1:151998015..152310892	312.878	[FLG,HRNR,LOC100131107,RPTN,S100A11,TCHH,TCHHL1]
1	rs2242288	10684098	A	C	0.102028	0.0162018	3.052e-10	0.0390169	58	chr1:10657920..10739863	81.944	[CASZ1,PEX14]
1	rs79472072	25397198	A	G	-0.16565	0.0266448	5.106e-10	0.0140713	1	chr1:25397198..25397198	0.001	[]
1	rs10903128	25363338	G	A	0.0413705	0.00689648	2.001e-09	0.276515	6	chr1:25328347..25399474	71.128	[]
1	rs6588396	51464565	C	T	-0.0376347	0.00627484	2.014e-09	0.418162	16	chr1:51462439..51742123	279.685	[C1orf185,RNF11]
1	rs17035390	10653622	C	T	0.092108	0.0154643	2.599e-09	0.0413247	1	chr1:10653622..10653622	0.001	[PEX14]
1	rs142020459	10572083	G	C	0.108292	0.0183651	3.733e-09	0.0300972	2	chr1:10509603..10572083	62.481	[APITD1-CORT,CORT,DFFA,PEX14]
1	rs143916866	24967537	T	C	-0.15486	0.026296	3.907e-09	0.0151761	5	chr1:24678622..24967537	288.916	[GRHL3,NCMAP,NIPAL3,RCAN3,STPG1]
1	rs34247753	11074998	C	CA	0.0482657	0.00843348	1.052e-08	0.158632	38	chr1:11070948..11101435	30.488	[MASP2,TARDBP]
1	rs12077761	25409256	G	A	-0.0546958	0.00964963	1.451e-08	0.120337	1	chr1:25409256..25409256	0.001	[]
1	rs1576101	41367198	T	A	0.035338	0.00633658	2.461e-08	0.373478	54	chr1:41365445..41407656	42.212	[]
1	rs11586871	25399669	T	C	0.0503486	0.00911773	3.366e-08	0.136719	39	chr1:25352623..25416083	63.461	[]
1	rs59304342	10753094	A	T	0.0882677	0.016085	4.094e-08	0.03824	5	chr1:10747151..10753094	5.944	[CASZ1]
2	rs11684254	239695893	G	C	0.0861109	0.00644222	1.103e-40	0.345973	135	chr2:239638300..239769642	131.343	[LOC100287387,TWIST2]
2	rs13021718	32181424	A	G	-0.093299	0.0088671	7.262e-26	0.140033	361	chr2:31741950..32681099	939.15	[BIRC6,DPY30,HP11026,MEMO1,NLRC4,SLC30A6,SPAST,SRD5A2,YIPF4]
2	rs77775907	31609942	A	G	-0.165209	0.0162714	3.37e-24	0.0394592	12	chr2:31490493..31951731	461.239	[EHD3,SRD5A2,XDH]
2	rs113923480	31610291	T	G	-0.164551	0.0162616	4.786e-24	0.039517	1	chr2:31610291..31610291	0.001	[XDH]
2	rs72787555	32922317	G	A	-0.145315	0.0156769	1.941e-20	0.0393577	79	chr2:32495827..33292317	796.491	[BIRC6,LTBP1,TTC27,YIPF4]
2	rs72787520	32851882	G	C	-0.145234	0.015778	3.542e-20	0.0387998	19	chr2:32379663..32851882	472.22	[BIRC6,NLRC4,SLC30A6,SPAST,YIPF4]
2	rs72787535	32873774	T	C	-0.144612	0.0159849	1.521e-19	0.0384427	6	chr2:32873774..33088870	215.097	[TTC27]
2	rs57613913	239703911	C	T	-0.0616606	0.00692779	5.732e-19	0.359968	1	chr2:239703911..239703911	0.001	[]
2	rs71421546	176991857	A	C	0.133572	0.015302	2.641e-18	0.0478542	7	chr2:176890697..177128088	237.392	[EVX2,HOXD1,HOXD3,HOXD4,HOXD8,HOXD9,HOXD10,HOXD11,HOXD12,HOXD13]
2	rs150489034	33038262	T	TTTTATA	-0.14408	0.0166504	5.146e-18	0.0371317	1	chr2:33038262..33038262	0.001	[TTC27]
2	rs59712316	239729257	C	G	-0.0559916	0.00652245	9.371e-18	0.334373	8	chr2:239729257..239752767	23.511	[]
2	rs7349332	219756383	T	C	0.0712122	0.00866633	2.131e-16	0.14874	80	chr2:219291486..219854317	562.832	[BCS1L,CDK5R2,CYP27A1,FEV,PLCD4,PRKAG3,RNF25,RQCD1,STK36,TTLL4,USP37,VIL1,WNT6,WNT10A,ZNF142]
2	rs10930758	177761828	G	A	-0.0499825	0.00618976	6.887e-16	0.473259	227	chr2:177628785..177838337	209.553	[]
2	rs6737860	177594983	C	T	0.0479956	0.00614068	5.553e-15	0.485159	43	chr2:177550753..177605388	54.636	[]
2	rs6756875	68160476	A	C	-0.0498838	0.00694279	6.81e-13	0.269683	57	chr2:68157053..68182315	25.263	[]
2	rs71421553	177086773	A	G	0.119204	0.0166146	7.345e-13	0.0376444	6	chr2:177082905..177117364	34.46	[]
2	rs16862069	174607506	C	G	0.157621	0.0221233	1.057e-12	0.0197829	8	chr2:174563030..174617984	54.955	[]
2	rs77781418	31508999	A	G	-0.126739	0.0178318	1.197e-12	0.031083	1	chr2:31508999..31508999	0.001	[]
2	rs13405699	174605633	A	C	0.153614	0.0221589	4.185e-12	0.020179	1	chr2:174605633..174605633	0.001	[]
2	rs146095395	239769885	T	C	0.0606655	0.0088376	6.747e-12	0.194669	3	chr2:239765648..239780842	15.195	[TWIST2]
2	rs191212334	31853354	G	C	-0.344417	0.052583	5.808e-11	0.00789447	1	chr2:31853354..31853354	0.001	[]
2	rs12185725	239949823	G	A	0.0507895	0.00790812	1.352e-10	0.193905	24	chr2:239931863..239950595	18.733	[]
2	rs12472159	177691543	G	C	-0.0428393	0.00677907	2.648e-10	0.300759	21	chr2:177583707..177691543	107.837	[]
2	rs74527054	174277357	T	A	0.0567853	0.0089972	2.786e-10	0.137066	8	chr2:174268498..174278708	10.211	[]
2	rs10928235	145678114	T	A	0.0441531	0.00712035	5.653e-10	0.249813	39	chr2:145634153..145820213	186.061	[]
2	rs6752754	6569566	G	A	-0.05259	0.00854427	7.562e-10	0.157623	41	chr2:6478428..6572624	94.197	[]
2	rs201796065	177346281	T	TA	0.153704	0.0249957	7.842e-10	0.0168247	1	chr2:177346281..177346281	0.001	[]
2	rs77177529	223070676	T	C	-0.0609437	0.0101287	1.789e-09	0.105315	25	chr2:223051502..223108422	56.921	[PAX3]
2	rs34769088	177226167	A	G	0.13401	0.0227088	3.63e-09	0.019037	3	chr2:177140226..177232845	92.62	[MTX2]
2	rs6748131	177074773	T	G	0.0614706	0.0104367	3.888e-09	0.103881	3	chr2:177069496..177114482	44.987	[]
2	rs35534179	177177413	G	GA	0.134828	0.0229265	4.106e-09	0.0193741	1	chr2:177177413..177177413	0.001	[MTX2]
2	rs17668846	177616844	C	T	-0.0438392	0.00747636	4.553e-09	0.225375	5	chr2:177484744..177616844	132.101	[]
2	rs745977	68081309	C	A	0.0356585	0.00620297	9.048e-09	0.447726	38	chr2:68075994..68120881	44.888	[]
2	rs6741945	68151619	T	C	0.0565913	0.00985171	9.28e-09	0.117678	8	chr2:68151619..68171137	19.519	[]
2	rs6755476	177858518	C	T	0.105683	0.0188133	1.948e-08	0.0276517	57	chr2:177791836..177889303	97.468	[]
2	rs192913879	219769345	A	G	0.228375	0.0407465	2.096e-08	0.00866515	1	chr2:219769345..219769345	0.001	[]
2	rs844193	30626423	T	A	0.0410187	0.00735821	2.494e-08	0.227623	49	chr2:30585905..30632740	46.836	[]
2	rs6732426	43587504	T	C	0.0344078	0.00617321	2.506e-08	0.46955	125	chr2:43576997..43850590	273.594	[THADA]
2	rs35689231	70412540	C	CA	0.0364484	0.0065456	2.584e-08	0.346327	195	chr2:70207503..70558994	351.492	[C2orf42,FAM136A,PCBP1,PCYOX1,SNRPG,TIA1]
2	rs149801367	60647456	T	A	0.0345051	0.00623967	3.218e-08	0.419293	68	chr2:60603950..60672771	68.822	[]
3	rs7642536	139032333	C	T	0.11304	0.00920454	1.279e-34	0.140571	37	chr3:138973466..139032333	58.868	[]
3	rs6772287	138721931	C	G	0.0877617	0.00979209	3.274e-19	0.110042	106	chr3:138294336..138944804	650.469	[CEP70,FAIM,FOXL2,FOXL2NB,PIK3CB,PRR23A,PRR23B,PRR23C]
3	rs115182912	125993274	A	G	0.173615	0.020959	1.223e-16	0.0242963	38	chr3:125877777..126099101	221.325	[ALDH1L1,KLF15]
3	rs35892873	126068948	T	C	-0.0547856	0.00671967	3.626e-16	0.311707	24	chr3:126060315..126096047	35.733	[KLF15]
3	rs13060333	151657769	A	T	0.0505326	0.00638345	2.496e-15	0.392686	222	chr3:151517293..151781175	263.883	[AADAC,SUCNR1]
3	rs9846246	107424090	A	G	-0.040702	0.00618385	4.685e-11	0.408433	2	chr3:107424090..107427969	3.88	[BBX]
3	rs1842202	151754768	G	A	-0.0456419	0.00710112	1.309e-10	0.250396	15	chr3:151431185..151781668	350.484	[AADAC,AADACL2,SUCNR1]
3	rs6802174	139006664	G	C	-0.0474844	0.00750827	2.564e-10	0.215846	7	chr3:138997688..139026525	28.838	[]
3	rs9878451	126091660	G	A	-0.0451426	0.00724558	4.688e-10	0.249463	4	chr3:126091660..126096948	5.289	[]
3	rs7621843	11603229	G	T	0.0471297	0.00786977	2.129e-09	0.188755	185	chr3:11284122..11669661	385.54	[ATG7,HRH1,VGLL4]
3	rs6440008	141154542	C	T	-0.0372228	0.00640811	6.332e-09	0.38471	113	chr3:141092050..141336557	244.508	[RASA2,ZBTB38]
3	rs77438261	138997951	G	A	0.0419586	0.00736546	1.228e-08	0.23476	2	chr3:138979660..138997951	18.292	[]
3	rs13092705	182237032	T	G	0.0647981	0.0117975	3.981e-08	0.0741387	40	chr3:182228278..182254435	26.158	[]
4	rs7680591	81197949	A	T	0.0668975	0.00626767	1.443e-26	0.419505	103	chr4:81157579..81207963	50.385	[FGF5]
4	rs141610938	81153105	C	CT	0.0808353	0.0112285	6.14e-13	0.0854276	62	chr4:81087206..81154300	67.095	[PRDM8]
4	rs76067940	108052995	T	C	-0.107791	0.016738	1.206e-10	0.036066	4	chr4:108051876..108105791	53.916	[]
4	rs147170006	107511425	G	GT	0.0501186	0.00780423	1.357e-10	0.194739	40	chr4:107502609..107781852	279.244	[]
4	rs10516537	107628071	C	A	0.0541948	0.00874038	5.669e-10	0.151919	63	chr4:107526293..107725937	199.645	[]
4	rs73837363	107543594	A	G	0.0879756	0.0145798	1.609e-09	0.0496821	1	chr4:107543594..107543594	0.001	[]
4	rs6811219	81251198	T	C	0.0469862	0.00782478	1.928e-09	0.193573	174	chr4:81208992..81741510	532.519	[C4orf22,FGF5]
4	rs4109346	107888788	A	T	-0.05575	0.00932191	2.238e-09	0.131444	32	chr4:107646416..107929979	283.564	[DKK2]
4	rs12509636	106010433	T	C	-0.0384429	0.00672898	1.116e-08	0.307249	12	chr4:106009763..106038169	28.407	[]
5	rs1422798	158320877	G	C	-0.0912062	0.00637994	2.837e-46	0.379859	168	chr5:158204425..158491655	287.231	[EBF1]
5	rs17626412	158338972	A	G	-0.113056	0.0143889	4.002e-15	0.0490919	7	chr5:158004749..158395269	390.521	[EBF1]
5	rs77239429	158305074	T	A	0.0690715	0.00928024	1e-13	0.125793	39	chr5:158267469..158445402	177.934	[EBF1]
5	rs4976028	67290733	G	A	-0.047357	0.0071545	3.646e-11	0.268672	4	chr5:67247709..67302094	54.386	[]
5	rs186749	122454305	G	A	0.0423865	0.00643613	4.57e-11	0.35427	96	chr5:122437657..122514120	76.464	[PRDM6]
5	rs17718288	158488326	C	G	0.0384277	0.00619849	5.705e-10	0.469822	22	chr5:158393842..158488742	94.901	[EBF1]
5	rs17543668	158311643	A	G	0.0621469	0.0101628	9.717e-10	0.102135	8	chr5:158132883..158447103	314.221	[EBF1]
5	rs1351637	44441703	G	A	-0.0432093	0.00780148	3.063e-08	0.19994	4	chr5:44439613..44589780	150.168	[]
5	rs35558461	67193451	A	G	0.0394572	0.00718253	3.959e-08	0.265117	1	chr5:67193451..67193451	0.001	[]
6	rs12203592	396321	T	C	0.109244	0.00739363	2.645e-49	0.215456	8	chr6:362095..475489	113.395	[IRF4]
6	rs9357047	9327556	C	T	0.0770721	0.00621741	3.068e-35	0.436401	192	chr6:9291883..9490667	198.785	[]
6	rs855256	9605188	T	C	0.083116	0.00869943	1.297e-21	0.149145	206	chr6:9585861..9764413	178.553	[OFCC1]
6	rs9388490	126704795	T	C	-0.0559537	0.00621698	2.327e-19	0.436211	262	chr6:126622537..127080700	458.164	[CENPW]
6	rs79032435	9464547	T	C	-0.124394	0.0149955	1.107e-16	0.0449872	41	chr6:9313621..9520003	206.383	[]
6	rs6457977	9420099	A	G	0.0633864	0.00798225	2.046e-15	0.185311	118	chr6:9247358..9520993	273.636	[]
6	rs12214131	106207921	A	G	0.0508054	0.0064161	2.452e-15	0.367356	45	chr6:106126253..106258113	131.861	[]
6	rs139092879	9538124	A	T	0.165413	0.0227021	3.231e-13	0.0195986	5	chr6:9538124..9818165	280.042	[OFCC1]
6	rs9392026	453415	A	G	-0.0422554	0.00627692	1.692e-11	0.406362	2	chr6:428486..453415	24.93	[]
6	rs4946689	106201608	A	G	0.0576623	0.0086668	2.895e-11	0.148281	14	chr6:106201608..106261670	60.063	[]
6	rs9398035	106041382	C	A	0.0407384	0.00618252	4.461e-11	0.494272	61	chr6:105996852..106055716	58.865	[]
6	rs4363059	126466605	T	A	0.0386951	0.00626203	6.485e-10	0.452249	102	chr6:126276262..126470887	194.626	[HINT3,TRMT11]
6	rs2671427	385735	C	T	0.038782	0.00639357	1.322e-09	0.374308	23	chr6:380328..425573	45.246	[IRF4]
6	rs6939066	9725270	T	C	-0.0387415	0.00639505	1.387e-09	0.364588	7	chr6:9575011..9801457	226.447	[OFCC1]
6	rs141173114	10186332	T	G	-0.172801	0.0291424	3.056e-09	0.0128601	2	chr6:10186332..10214850	28.519	[]
6	rs114190032	9509256	T	G	-0.0370266	0.00625976	3.339e-09	0.429998	3	chr6:9509256..9576203	66.948	[]
6	rs11242982	537157	T	C	0.0368205	0.00623622	3.563e-09	0.441644	16	chr6:497520..544239	46.72	[EXOC2]
6	rs78576899	9304649	T	C	0.0688728	0.0118351	5.942e-09	0.0787654	1	chr6:9304649..9304649	0.001	[]
6	rs9392563	470930	T	G	0.0399779	0.00693781	8.343e-09	0.490431	3	chr6:469716..470930	1.215	[]
6	rs62390189	327331	A	G	0.0755225	0.0133343	1.489e-08	0.125032	2	chr6:290951..327331	36.381	[DUSP22]
6	rs201794747	9589918	G	GGC	0.0808518	0.014479	2.361e-08	0.0483419	1	chr6:9589918..9589918	0.001	[]
6	rs55885134	9673961	G	GCTT	-0.0374	0.00673064	2.763e-08	0.30935	3	chr6:9583208..9673961	90.754	[OFCC1]
6	rs11759950	10226233	T	C	-0.0466873	0.0084218	2.977e-08	0.167906	48	chr6:10187163..10241822	54.66	[]
6	rs2294736	9389312	C	T	0.0755709	0.0136384	3.021e-08	0.0533438	1	chr6:9389312..9389312	0.001	[]
6	rs2344704	111965138	A	T	0.0344008	0.00625449	3.812e-08	0.426675	80	chr6:111951945..111967411	15.467	[]
6	rs11243290	9000423	G	A	0.0341437	0.00623868	4.447e-08	0.482661	10	chr6:8909840..9016098	106.259	[]
7	rs71530654	18896988	G	A	0.112465	0.00634675	4.684e-70	0.404829	98	chr7:18861793..18933411	71.619	[HDAC9]
7	rs939963	68587797	C	G	-0.0900094	0.00616576	3.576e-48	0.452676	82	chr7:68567586..68651536	83.951	[]
7	rs4718886	68898689	G	A	-0.0729562	0.00712769	1.448e-24	0.250597	203	chr7:68740474..69055951	315.478	[]
7	rs9691699	533352	C	G	0.0586672	0.00618119	2.374e-21	0.457501	97	chr7:513709..565024	51.316	[PDGFA]
7	rs9801466	564096	A	G	-0.0687191	0.00822457	6.681e-17	0.176332	19	chr7:492171..574149	81.979	[PDGFA]
7	rs58788673	46904299	TCA	T	0.060618	0.00729933	1.025e-16	0.233713	220	chr7:46798132..46976061	177.93	[]
7	rs12540951	68623892	A	G	-0.0647257	0.00823828	4.018e-15	0.173338	20	chr7:68615318..68686586	71.269	[]
7	rs56349397	18865362	C	A	0.0565165	0.0072293	5.478e-15	0.324941	1	chr7:18865362..18865362	0.001	[HDAC9]
7	rs1195215	68736093	T	C	0.049285	0.00638877	1.238e-14	0.399779	21	chr7:68732195..68908066	175.872	[]
7	rs10278449	18931219	T	C	-0.0717058	0.00936613	1.953e-14	0.138574	2	chr7:18915133..18931219	16.087	[HDAC9]
7	rs6943067	68908285	A	T	-0.0449525	0.00647758	3.974e-12	0.372363	299	chr7:68907980..69406854	498.875	[AUTS2]
7	rs10225279	19133072	T	G	-0.0411354	0.00621191	3.577e-11	0.440925	14	chr7:19132687..19140629	7.943	[]
7	rs145126703	69696742	T	TTTTG	0.0488274	0.00742947	5.006e-11	0.241588	1	chr7:69696742..69696742	0.001	[AUTS2]
7	rs9801230	564029	A	T	-0.0481417	0.00779381	6.584e-10	0.224624	2	chr7:562225..564029	1.805	[]
7	rs117584427	18887633	G	A	-0.127959	0.0208281	8.125e-10	0.0222226	1	chr7:18887633..18887633	0.001	[HDAC9]
7	rs9719620	130994380	C	T	-0.0372316	0.00617463	1.653e-09	0.462574	47	chr7:130963559..131083712	120.154	[MKLN1]
7	rs9330381	565948	A	G	-0.0434477	0.00738277	4.004e-09	0.339168	2	chr7:565948..569695	3.748	[]
7	rs801525	18710388	A	G	0.0571477	0.00980661	5.66e-09	0.109808	50	chr7:18693393..18760347	66.955	[HDAC9]
7	rs77527369	18925499	A	G	-0.0649193	0.0111607	6.034e-09	0.10609	1	chr7:18925499..18925499	0.001	[HDAC9]
7	rs150909339	552468	C	G	-0.0655191	0.0118823	3.524e-08	0.0878122	2	chr7:551096..552468	1.373	[PDGFA]
7	rs199961668	510890	AC	A	-0.0430102	0.00786751	4.603e-08	0.314235	2	chr7:509593..510890	1.298	[]
7	rs73071393	19096224	G	A	-0.0809223	0.0148183	4.757e-08	0.0461474	2	chr7:19096224..19109456	13.233	[]
7	rs117463770	69607509	G	C	-0.125367	0.0229725	4.857e-08	0.019544	29	chr7:69264273..69713261	448.989	[AUTS2]
7	rs1474368	69707623	G	A	-0.0376489	0.00690261	4.939e-08	0.275154	209	chr7:69415279..69775270	359.992	[AUTS2]
8	rs79206101	109145555	T	C	0.306722	0.0284708	4.915e-27	0.0121872	25	chr8:108925623..109636762	711.14	[EIF3E,EMC2,RSPO2]
8	rs77096234	109657430	A	G	0.25867	0.0269639	8.898e-22	0.013403	1	chr8:109657430..109657430	0.001	[]
8	rs183207557	109682947	T	C	0.50015	0.0534944	9.131e-21	0.00568038	1	chr8:109682947..109682947	0.001	[]
8	rs77767830	109268396	T	A	0.159832	0.0179579	5.739e-19	0.0315793	2	chr8:109268396..109430004	161.609	[]
8	rs2047198	108962627	T	C	-0.0574663	0.00646045	6.017e-19	0.350274	137	chr8:108847459..109179914	332.456	[RSPO2]
8	rs117769774	109102918	A	G	0.150582	0.0179505	5.033e-17	0.0318785	2	chr8:109102918..109330350	227.433	[EIF3E]
8	rs145562694	108818496	A	C	0.218917	0.0272103	8.775e-16	0.0138023	5	chr8:108493913..108818496	324.584	[ANGPT1]
8	rs55908337	109872393	T	C	0.221919	0.0276321	9.85e-16	0.0139384	1	chr8:109872393..109872393	0.001	[]
8	rs75520281	109974922	G	A	0.220857	0.0288251	1.862e-14	0.0114612	1	chr8:109974922..109974922	0.001	[]
8	rs147906392	108906471	G	C	-0.0498735	0.00708645	1.976e-12	0.275388	1	chr8:108906471..108906471	0.001	[]
8	rs34657911	109093743	A	G	0.0515023	0.00764805	1.667e-11	0.203212	298	chr8:109063434..109539991	476.558	[EIF3E,EMC2,RSPO2]
8	rs118013985	109394188	C	T	0.143139	0.0219921	7.651e-11	0.0198112	1	chr8:109394188..109394188	0.001	[]
8	rs6982226	117015142	T	G	-0.0406953	0.00629818	1.046e-10	0.43091	168	chr8:116960729..117134944	174.216	[]
8	rs76729432	108805685	C	T	0.0760672	0.0120185	2.485e-10	0.0772683	2	chr8:108805685..108859409	53.725	[]
8	rs58833541	117111910	G	T	-0.0453331	0.00772846	4.498e-09	0.31668	2	chr8:117111910..117111912	0.003	[]
8	rs10808813	77516942	G	C	0.0402379	0.00693225	6.494e-09	0.28793	29	chr8:77516942..77566202	49.261	[]
8	rs998245	117239874	T	C	-0.051353	0.00906658	1.487e-08	0.152762	1	chr8:117239874..117239874	0.001	[]
8	rs800890	116439639	C	T	-0.0411213	0.00733295	2.06e-08	0.235185	24	chr8:116416131..116678277	262.147	[TRPS1]
9	rs73667301	109628051	G	A	0.0747676	0.0129142	7.096e-09	0.061009	15	chr9:109615601..109695139	79.539	[ZNF462]
10	rs1907350	78194812	G	A	-0.0634215	0.00619895	1.518e-24	0.450181	639	chr10:78063174..78640827	577.654	[C10orf11,KCNMA1]
10	rs3781452	126355129	T	C	-0.0601451	0.00640119	5.89e-21	0.366444	147	chr10:126262806..126537000	274.195	[FAM53B,FAM175B,LHPP,METTL10]
10	rs199978639	78377289	A	ATAT	-0.0560772	0.00629231	5.166e-19	0.403007	1	chr10:78377289..78377289	0.001	[]
10	rs11594897	78377573	G	T	-0.0552106	0.00630723	2.127e-18	0.400616	1	chr10:78377573..78377573	0.001	[]
10	rs11497798	78377170	T	C	0.0494425	0.00618343	1.311e-15	0.49737	12	chr10:78370481..78399019	28.539	[]
10	rs1873465	78189959	T	C	-0.0827436	0.0122508	1.451e-11	0.0674623	11	chr10:78167388..78198607	31.22	[C10orf11]
10	rs1906457	62938418	G	T	0.0351677	0.00629093	2.279e-08	0.438199	34	chr10:62855634..62954306	98.673	[]
11	rs2863081	44431807	A	G	0.0791024	0.00863899	5.549e-20	0.149119	138	chr11:44378010..44504844	126.835	[]
11	rs78321654	27453319	A	T	0.093162	0.0155018	1.87e-09	0.0432818	18	chr11:27420541..27453752	33.212	[LGR4]
11	rs174581	61606683	A	G	-0.0369337	0.00645259	1.047e-08	0.355636	57	chr11:61543499..61624181	80.683	[FADS1,FADS2,FEN1,MYRF,TMEM258]
11	rs11220486	126291021	A	G	0.0437404	0.00768212	1.249e-08	0.206406	3	chr11:126286010..126291021	5.012	[]
12	rs7974900	26428677	C	T	-0.0610378	0.00698052	2.314e-18	0.262611	21	chr12:26393154..26438189	45.036	[]
12	rs10771462	29157328	A	G	0.0653969	0.00806283	5.131e-16	0.177875	386	chr12:29118776..29528458	409.683	[ERGIC2,FAR2]
12	rs73072491	26438450	G	C	-0.0664757	0.00917526	4.38e-13	0.137197	19	chr12:26307825..26438450	130.626	[SSPN]
12	rs76972608	130563363	T	A	-0.0629702	0.00909981	4.57e-12	0.138288	16	chr12:130556647..130580721	24.075	[]
12	rs10843003	27986940	G	T	-0.0484506	0.00780231	5.345e-10	0.196253	37	chr12:27982062..28028145	46.084	[]
12	rs112949019	130563219	A	AC	-0.0510754	0.00835223	9.712e-10	0.193432	1	chr12:130563219..130563219	0.001	[]
12	rs11049231	28091700	A	G	-0.089608	0.0156666	1.073e-08	0.0411509	47	chr12:28008486..28123362	114.877	[PTHLH]
12	rs74895226	29239638	T	A	-0.0975425	0.0173923	2.053e-08	0.035463	25	chr12:29034762..29440112	405.351	[FAR2]
14	rs72662240	30562926	A	C	0.0491372	0.00811269	1.398e-09	0.176468	20	chr14:30547644..30575473	27.83	[]
14	rs8013382	95208412	G	A	-0.0474667	0.00802924	3.406e-09	0.180294	46	chr14:95173162..95237215	64.054	[GSC]
15	rs12902958	70040254	A	G	0.0805314	0.0101851	2.693e-15	0.103632	73	chr15:69964858..70048157	83.3	[]
15	rs2117234	70039200	T	C	-0.0479261	0.00615317	6.885e-15	0.473056	28	chr15:69965730..70048984	83.255	[]
15	rs2074585	91009484	A	G	-0.041139	0.00614556	2.192e-11	0.487054	123	chr15:90891566..91088596	197.031	[CRTC3,IQGAP1,ZNF774]
15	rs997683	57541904	C	A	0.0475651	0.00784313	1.332e-09	0.191117	94	chr15:57106228..57598471	492.244	[TCF12]
15	rs2028122	60841275	G	A	-0.0349095	0.00630083	3.031e-08	0.395932	14	chr15:60814663..60846294	31.632	[RORA]
16	rs246180	14391923	A	C	-0.0475407	0.00659777	5.857e-13	0.326464	22	chr16:14377400..14425409	48.01	[]
16	rs12447206	85319399	A	C	0.048775	0.00868756	1.983e-08	0.146206	8	chr16:85319399..85353708	34.31	[]
17	rs112385572	44066172	G	A	-0.0768246	0.00689515	8.451e-29	0.238502	365	chr17:43567337..44368266	800.93	[CRHR1,KANSL1,MAPT,PLEKHM1,SPPL2C,STH]
17	rs538628	44787313	C	G	-0.0800835	0.00741385	3.6e-27	0.218162	77	chr17:44574542..44865603	291.062	[ARL17A,LRRC37A2,NSF,WNT3]
17	rs144733372	43564222	G	T	-0.076714	0.00787135	2.004e-22	0.187828	31	chr17:43208068..43653129	445.062	[ACBD4,ARHGAP27,FMNL1,HEXIM1,HEXIM2,MAP3K14,PLCD3,PLEKHM1,SPATA32]
17	rs62060349	55231168	C	T	0.0600078	0.00619343	3.505e-22	0.448058	76	chr17:55217723..55278437	60.715	[]
17	rs145226407	55231601	G	A	-0.0650923	0.00863472	4.832e-14	0.152915	9	chr17:55231601..55279508	47.908	[]
17	rs72809169	12457050	G	A	0.0935732	0.0144437	9.346e-11	0.048631	70	chr17:12441089..12521291	80.203	[]
17	rs140843301	43939214	C	T	-0.164049	0.0281688	5.787e-09	0.0238302	1	chr17:43939214..43939214	0.001	[]
17	rs143942024	43926458	T	C	-0.167697	0.0306997	4.716e-08	0.0214266	1	chr17:43926458..43926458	0.001	[]
18	rs8085664	42814156	A	C	-0.0743733	0.00688311	3.473e-27	0.276183	279	chr18:42671636..42838477	166.842	[SLC14A2]
18	rs11659559	53005934	A	C	0.0788002	0.0122086	1.095e-10	0.0697631	11	chr18:52918380..53161930	243.551	[TCF4]
18	rs8095770	53093724	C	T	0.0706182	0.011495	8.136e-10	0.0783457	1	chr18:53093724..53093724	0.001	[TCF4]
18	rs206447	10439986	G	A	0.0399174	0.00663647	1.812e-09	0.323494	35	chr18:10429422..10451695	22.274	[]
18	rs17594358	53050489	G	A	0.0742359	0.0123457	1.832e-09	0.066753	1	chr18:53050489..53050489	0.001	[TCF4]
18	rs7226979	60924970	T	C	0.0377246	0.00633237	2.579e-09	0.461385	10	chr18:60924613..60941441	16.829	[BCL2]
18	rs427754	10361777	C	T	0.0381717	0.00645368	3.345e-09	0.38961	53	chr18:10346221..10362444	16.224	[]
18	rs29073	9971790	C	A	-0.0362982	0.00615745	3.769e-09	0.49463	2	chr18:9971790..9972389	0.6	[]
18	rs78803556	53118462	A	G	0.0698925	0.0124063	1.774e-08	0.0666753	1	chr18:53118462..53118462	0.001	[TCF4]
18	rs1276250	42440538	C	T	0.0535618	0.00969894	3.359e-08	0.114967	18	chr18:42422069..42600179	178.111	[SETBP1]
18	rs12326164	42676928	G	A	-0.0391557	0.00714415	4.253e-08	0.24825	39	chr18:42628328..42733126	104.799	[SETBP1]
20	rs201593	22033819	A	G	0.133999	0.0061829	1.056e-103	0.434836	663	chr20:21714807..22306243	591.437	[]
20	rs6035986	21894764	T	G	0.123564	0.00621466	1.203e-87	0.4349	1	chr20:21894764..21894764	0.001	[]
20	rs7362397	22100070	T	C	-0.114754	0.00671776	3.018e-65	0.298016	1	chr20:22100070..22100070	0.001	[]
20	rs7362398	22100072	T	C	-0.114754	0.00671776	3.018e-65	0.298016	1	chr20:22100072..22100072	0.001	[]
20	rs199791	22284321	C	T	0.0614582	0.00625635	9.344e-23	0.408906	18	chr20:22278295..22327111	48.817	[]
20	rs75434917	22043888	T	A	-0.0994926	0.0113039	1.388e-18	0.0858978	12	chr20:21797470..22202955	405.486	[]
20	rs17265513	39832628	C	T	-0.0613316	0.00769226	1.577e-15	0.200117	152	chr20:39620847..40270138	649.292	[CHD6,EMILIN3,LPIN3,PLCG1,TOP1,ZHX3]
20	rs6047620	21761183	C	T	0.0918814	0.0127379	5.538e-13	0.0657317	141	chr20:21761182..22139447	378.266	[]
20	rs79284724	22106657	G	A	0.0813506	0.0113967	9.585e-13	0.0844986	8	chr20:21701469..22106657	405.189	[]
20	rs199823	22323858	A	C	0.0482336	0.00680801	1.409e-12	0.301847	30	chr20:22307127..22326531	19.405	[]
20	rs17752365	22047324	A	T	0.0716704	0.0106434	1.67e-11	0.0983998	3	chr20:22027232..22079085	51.854	[]
20	rs985546	55434683	T	C	0.0491772	0.00742119	3.468e-11	0.219106	2	chr20:55434683..55435053	0.371	[]
20	rs6113382	21787568	A	C	-0.128146	0.0196231	6.62e-11	0.0253014	45	chr20:21692884..21931614	238.731	[PAX1]
20	rs62219289	21988334	G	A	-0.07558	0.012403	1.111e-09	0.067305	11	chr20:21927651..22415536	487.886	[]
20	rs12625546	22037409	T	C	-0.0954443	0.0157316	1.312e-09	0.0398022	5	chr20:22032402..22265033	232.632	[]
20	rs78297031	21989602	C	T	-0.112933	0.0191861	3.976e-09	0.0279547	4	chr20:21989602..22249715	260.114	[]
20	rs6025176	55390633	C	T	0.0365914	0.00670615	4.881e-08	0.344298	1	chr20:55390633..55390633	0.001	[]
21	rs68088846	36208167	A	G	0.0678605	0.00755189	2.649e-19	0.207578	6	chr21:36198190..36223627	25.438	[RUNX1]
21	rs690333	46172675	C	A	0.0384246	0.00634985	1.447e-09	0.376716	20	chr21:46154672..46174999	20.328	[]
21	rs112348497	44627879	GC	G	0.0814921	0.0135858	2.007e-09	0.0552349	6	chr21:44627024..44631463	4.44	[]
21	rs11701104	36238517	T	C	-0.0433979	0.00755655	9.348e-09	0.22644	9	chr21:36236443..36238517	2.075	[RUNX1]
21	rs75732647	44626739	T	C	0.0785664	0.0139184	1.662e-08	0.0524052	1	chr21:44626739..44626739	0.001	[]
21	rs141433484	45936195	A	C	-0.157068	0.0287405	4.649e-08	0.0122895	1	chr21:45936195..45936195	0.001	[TSPEAR]
X	rs73221556	65933285	A	C	-0.5266	0.0136284	0	0.1375	20	chr23:65456529..66405249	948.721	[EDA2R,HEPH]
X	rs12558842	66481800	C	C	-0.5427	0.0126386	0	0.1634	9	chr23:66481800..66918453	436.654	[AR]
X	rs5919427	67003584	C	C	-0.3457	0.0121043	5.101e-178	0.1868	12	chr23:66994254..67405450	411.197	[OPHN1]
X	rs140488081	67496002	T	C	-0.3972	0.0240581	4.643e-61	0.04046	5	chr23:67496002..67910139	414.138	[OPHN1,STARD8,YIPF6]
X	rs147154263	65083247	T	G	-0.4266	0.0264969	3.562e-58	0.0331	3	chr23:65083247..65328292	245.046	[VSIG4]
X	rs148652266	67139063	A	G	-0.5063	0.03601	7.646e-45	0.01773	2	chr23:67139063..67254964	115.902	[]
X	rs145867342	65541956	T	C	-0.324	0.0230769	1.114e-44	0.04431	3	chr23:65198460..65541956	343.497	[HEPH,VSIG4]
X	rs7061504	67363801	G	G	0.1939	0.0149269	1.673e-38	0.1141	4	chr23:67281956..67368261	86.306	[OPHN1]
X	rs147829649	58005480	G	G	-0.2829	0.0241588	1.298e-31	0.0402	1	chr23:58005480..58005480	0.001	[]
X	rs17216820	66337545	T	T	0.1946	0.018463	5.823e-26	0.07136	3	chr23:66034610..66673840	639.231	[]
X	rs17302236	67174031	C	G	0.1799	0.0177416	3.949e-24	0.07785	4	chr23:67174031..67643164	469.134	[OPHN1]
X	rs73212868	67425333	A	G	-0.3038	0.0313811	3.792e-22	0.02343	2	chr23:67425333..67477073	51.741	[OPHN1]
X	rs112069404	65551148	A	C	0.155	0.0168956	4.698e-20	0.08657	6	chr23:65122504..65750807	628.304	[HEPH,VSIG4]
X	rs140914450	62062376	G	G	-0.1686	0.0184182	5.664e-20	0.07182	1	chr23:62062376..62062376	0.001	[]
X	rs139470886	57309130	A	G	-0.1657	0.0186305	6.098e-19	0.0699	2	chr23:56959495..57309130	349.636	[SPIN2A,SPIN2B,SPIN3]
X	rs5965561	67595914	C	C	0.1432	0.0162358	1.18e-18	0.09467	8	chr23:67595914..67860953	265.04	[OPHN1,YIPF6]
X	rs73213393	65217956	A	G	-0.3322	0.0384135	5.389e-18	0.01554	1	chr23:65217956..65217956	0.001	[]
X	rs144393202	66114131	A	C	0.2917	0.0338517	7.045e-18	0.02008	1	chr23:66114131..66114131	0.001	[]
X	rs79798752	65632419	C	C	0.08221	0.0104288	3.268e-15	0.295	5	chr23:65264691..66073844	809.154	[EDA2R,HEPH]
X	rs111810219	62937827	A	G	-0.2067	0.0268546	1.417e-14	0.03234	3	chr23:62937827..63266933	329.107	[ARHGEF9]
X	rs5934505	8913826	C	C	0.08238	0.0107196	1.555e-14	0.2691	4	chr23:8874087..8916646	42.56	[]
X	rs140707533	54624388	A	G	-0.1341	0.0176424	2.989e-14	0.07862	1	chr23:54624388..54624388	0.001	[]
X	rs142169094	66555112	G	G	0.08356	0.0113718	2.036e-13	0.2254	2	chr23:66308683..66555112	246.43	[]
X	rs73227823	66566037	G	G	0.1452	0.0199095	3.078e-13	0.06071	2	chr23:66350586..66566037	215.452	[]
X	rs6624142	64405169	C	C	-0.07931	0.0109499	4.444e-13	0.2523	3	chr23:63940498..64405169	464.672	[ZC4H2]
X	rs138876904	65052140	T	C	0.2704	0.0386175	2.55e-12	0.01539	1	chr23:65052140..65052140	0.001	[]
X	rs5965019	64993425	A	G	0.08455	0.0121028	2.865e-12	0.1909	3	chr23:64965828..65179429	213.602	[]
X	rs146112277	63755444	A	C	-0.1346	0.0198174	1.119e-11	0.06118	1	chr23:63755444..63755444	0.001	[]
X	rs147670940	65252953	T	C	-0.1684	0.0252701	2.687e-11	0.0367	2	chr23:65084789..65252953	168.165	[VSIG4]
X	rs73209413	58097007	C	C	-0.201	0.0311628	1.126e-10	0.02386	3	chr23:57746643..58097007	350.365	[ZXDA]
X	rs73221553	65926042	A	G	0.1373	0.0213	1.158e-10	0.05274	1	chr23:65926042..65926042	0.001	[]
X	rs73212804	67158738	T	C	0.1317	0.0206039	1.65e-10	0.05637	2	chr23:67158738..67467092	308.355	[OPHN1]
X	rs113222435	66963707	T	G	0.1603	0.0252242	2.107e-10	0.03681	1	chr23:66963707..66963707	0.001	[]
X	rs138216499	55330959	A	G	-0.09951	0.0160293	5.402e-10	0.0973	2	chr23:55163863..55330959	167.097	[FAM104B,MTRNR2L10,PAGE3,PAGE5]
X	rs11796997	152759861	A	G	0.06176	0.00995808	5.603e-10	0.3518	2	chr23:152747650..152759861	12.212	[]
X	rs146636673	66460331	C	G	0.183	0.0309226	3.279e-09	0.02419	3	chr23:66335898..66460331	124.434	[]
X	rs143755874	64859400	A	G	-0.1862	0.0315379	3.562e-09	0.02323	2	chr23:64859400..64970588	111.189	[MSN]
X	rs62604342	66701867	G	G	0.1614	0.0275098	4.461e-09	0.03082	1	chr23:66701867..66701867	0.001	[]
X	rs5989004	58194651	T	G	-0.1239	0.0219176	1.581e-08	0.04954	2	chr23:58194651..58216902	22.252	[]
X	rs73206583	56287726	A	G	-0.06571	0.0119061	3.423e-08	0.1989	1	chr23:56287726..56287726	0.001	[KLF8]
